# Supplementary material for: Loss of PIM2 enhances the anti-proliferative effect of the pan-PIM kinase inhibitor AZD1208 in non-Hodgkin lymphomas
Source: Springer Nature journal article supplement (doi:10.1186/s12943-015-0477-z), 2015-12-01
Supplement: MOESM2 [file 9763296]

## Supplementary table 1: Designed primers and ShRNAs

| Function                | Location           | Sequence forward                                  | Sequence reverse           |
|-------------------------|--------------------|---------------------------------------------------|----------------------------|
| ChIP <i>GNL3</i> locus  | <i>GNL3</i> -0.5   | AGGCCCTGAGCAACGGAGGAA                             | GCGCACTACGGGTCCGAAACTC     |
| ChIP <i>GNL3</i> locus  | <i>GNL3</i> -3.5   | CCTGCCCAACTGCCCCCTAGTC                            | GGGGGAGGGTGTTTTCCAGACCT    |
| ChIP <i>GNL3</i> locus  | <i>GNL3</i> -6.5   | TCCTGCTTGGGCCTGGTGTGGA                            | GCTACCTCCCCTCCAGCAGTGT     |
| ChIP <i>GNL3</i> locus  | <i>GNL3</i> +0.1   | CCAGCGGAGGCAGGTTGATGTG                            | TGGCTGCAGCAACTCCAGACG      |
| ChIP <i>GNL3</i> locus  | <i>GNL3</i> +0.4   | TTAACCGCGCGGGCTCATTCTG                            | CAGCTCTCACCTGGGCCAGTCT     |
| ChIP <i>GNL3</i> locus  | <i>GNL3</i> +3.5   | GCCTCCGATGTTGTCCTAGAGGTGTT                        | TCCCCACTGCCTAGCACTGTCTC    |
| ChIP <i>GNL3</i> locus  | <i>GNL3</i> +5     | TGGGCTCTGGAGCCTGATTGCT                            | AGCATTCTTCTTTGCCTTCACACGCT |
| ChIP <i>GNL3</i> locus  | <i>GNL3</i> +9     | CCAAGGTGGCGGACATTCCACA                            | AGCAGAACCCTGGCTGGTAGCAT    |
| <i>CTCF</i> control     | <i>CTCF</i> 1      | GGCCAGGACTCCACGTTTCTAGA                           | GCCCTCTGGTGTTTGGCAGCAA     |
| <i>CTCF</i> control     | <i>CTCF</i> 2      | CACCCAGCAGAGGGCCAGATA                             | CCCTTCGCCTTCTCTCCAGCCA     |
| ChIP <i>NPM1</i> gene   | <i>NPM1</i> +1     | GCCTGCTTGTGGAGCGGGTAGA                            | GCCGAAGCACGCGAGGTAAGTC     |
| ChIP <i>ID2</i> locus   | <i>ID2</i> -1.7    | AGGCTCGAACTGTGGGAGGACT                            | CTGCCTGCGACTCTGTCCCTGA     |
| ChIP <i>ID2</i> locus   | <i>ID2</i> -1.4    | GGAAGGCCCTCCGCAAACCTTCT                           | TGACAGCTATGCGCCCCATGAC     |
| ChIP <i>SEPX1</i> pro   | <i>SEPX1</i> -0.3  | CGCGGAAAGGCTGCATGACCTC                            | CGCGAATCCGTAGGGTCGTGTC     |
| ChIP <i>FOSL1</i> locus | <i>FOSL1</i> +1.15 | GCCCTCGATCCCTTTGCCGAATG                           | AGGAAATGGGCACCTGCAGCCT     |
| ChIP <i>FOSL1</i> locus | <i>FOSL1</i> -37   | CGGGGATCAAAGATGAAGAA                              | TGGGGAGCAGATAGCTGAGT       |
| ShRNA                   | shPIM1             | ACATCCTTATCGACCTCAATCCTCGAGGATTGAGGTCGATAAAGGATGT |                            |
| ShRNA                   | shPIM2             | GATGAACCCTACACTGACTTTCTCGAGAAAGTCAGTGTAGGGTTCATC  |                            |
| ShRNA                   | ShMYC              | CCTGAGACAGATCAGCAACAACCTCGAGTTGTTGCTGATCTGTCTCAGG |                            |

## Supplementary table 2: Western Blotting antibodies

| <b>Antibody</b>      | <b>Catalogue</b> | <b>Company</b>            | <b>Block</b> | <b>Primary</b> | <b>Secondary</b> |
|----------------------|------------------|---------------------------|--------------|----------------|------------------|
| Anti-H3              | ab1791           | Abcam                     | 5% Milk      | 1:100000       | 1 in 10,000      |
| anti- $\beta$ -actin | A1978            | Sigma Aldrich             | 5% Milk      | 1:100000       | 1 in 10,000      |
| anti-BAD             | 9239             | Cell Signaling Technology | 5% Milk      | 1:1000         | 1 in 10,000      |
| anti-BADS112p        | 5284             | Cell Signaling Technology | 5% BSA       | 1:1000         | 1 in 10,000      |
| anti-c-MYC           | sc-764           | Santa Cruz Biotechnology  | 5% BSA       | 1:3000         | 1 in 10,000      |
| anti-PIM1            | 2907             | Cell Signaling Technology | 5% Milk      | 1:500          | 1 in 10,000      |
| anti-PIM2            | 61159            | Active Motif              | 5% BSA       | 1:3000         | 1 in 10,000      |
